# Supplementary material
Source: publisher site journal article supplement (https://study.sagepub.com/sites/default/files/14%20Bloomberg%203e%20Appendix%20W.pdf)
Supplement: Supplementary file 1 [file 14%20Bloomberg%203e%20Appendix%20W.pdf]

## Appendix W. Data Summary Table: Finding 3

|       | Name    | How They Learned What They Needed |                                     |                           |         |             |                     |
|-------|---------|-----------------------------------|-------------------------------------|---------------------------|---------|-------------|---------------------|
|       |         | Dialogue With Colleagues          | Self-Directedness/ Reading/Research | Post-Course Work Seminars | Advisor | Course Work | Other Expert Advice |
| 1     | Mollie  | X                                 |                                     | X                         | X       |             |                     |
| 2     | Hank    | X                                 |                                     |                           |         |             |                     |
| 3     | Morris  | X                                 | X                                   |                           |         |             |                     |
| 4     | Debbie  | X                                 |                                     |                           |         |             |                     |
| 5     | Doris   | X                                 |                                     |                           |         |             |                     |
| 6     | Anthony | X                                 | X                                   |                           |         |             |                     |
| 7     | Anne    | X                                 |                                     |                           |         |             |                     |
| 8     | Brent   | X                                 |                                     |                           |         |             |                     |
| 9     | Angela  |                                   | X                                   |                           |         |             |                     |
| 10    | Jane    | X                                 |                                     |                           | X       |             | X                   |
| 11    | Brad    | X                                 | X                                   |                           |         |             |                     |
| 12    | Dexter  |                                   |                                     | X                         |         |             |                     |
| 13    | Frankie | X                                 |                                     |                           |         |             |                     |
| 14    | Sally   |                                   |                                     | X                         | X       |             |                     |
| 15    | Shana   | X                                 |                                     |                           |         |             |                     |
| 16    | Lin     | X                                 |                                     |                           |         | X           |                     |
| 17    | Carin   |                                   | X                                   |                           |         |             |                     |
| 18    | Fay     |                                   | X                                   | X                         | X       |             |                     |
| 19    | Connie  | X                                 |                                     | X                         |         |             |                     |
| 20    | Julia   | X                                 |                                     |                           |         |             |                     |
| TOTAL | 20      | 15 (75%)                          | 6 (30%)                             | 5 (25%)                   | 4 (20%) | 1 (5%)      | 1 (5%)              |
